# Supplementary material
Source: publisher site journal article supplement (https://www.spandidos-publications.com/4100/downloadSupplementary)
Supplement: Supplementary file 1 [file downloadSupplementary]

Table SI. Positive Pixel Count v9 algorithm input parameters.

| Algorithm Inputs                         | Value                   |
|------------------------------------------|-------------------------|
| Algorithm                                | Positive Pixel Count v9 |
| Version                                  | 9.1                     |
| View Width                               | 1,000                   |
| View Height                              | 1,000                   |
| Overlap Size                             | 0                       |
| Image Zoom                               | 1.0                     |
| Compression Quality                      | 30                      |
| Classifier                               | None                    |
| Class List                               | None                    |
| Classifier Neighborhood                  | 0                       |
| Hue Value                                | 0.1                     |
| Hue Width                                | 0.5                     |
| Color Saturation Threshold               | 0.04                    |
| Intensity Threshold WEAK (Upper limit)   | 220                     |
| Intensity Threshold WEAK (Lower limit)   | 175                     |
| Intensity Threshold MEDIUM (Upper limit) | 175                     |
| Intensity Threshold MEDIUM (Lower limit) | 175                     |
| Intensity Threshold STRONG (Upper limit) | 175                     |
| Intensity Threshold STRONG (Lower limit) | 0                       |
| Intensity Threshold Negative Pixels      | -1                      |
